# Supplementary material
Source: Copernicus journal article supplement (doi:10.5194/soil-12-599-2026)
Supplement: Supplementary file 1 [file soil-12-599-2026-supplement.pdf]

Supplement of SOIL, 12, 599–618, 2026  
<https://doi.org/10.5194/soil-12-599-2026-supplement>  
© Author(s) 2026. CC BY 4.0 License.

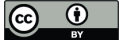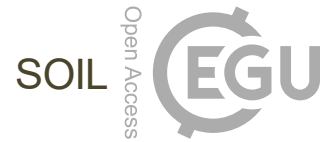

*Supplement of*

## **Vulnerability of carbon in subalpine soils in the face of warmer temperatures**

**Dario Püntener et al.**

*Correspondence to:* Dario Püntener ([dario.puentener@geo.uzh.ch](mailto:dario.puentener@geo.uzh.ch))

The copyright of individual parts of the supplement might differ from the article licence.

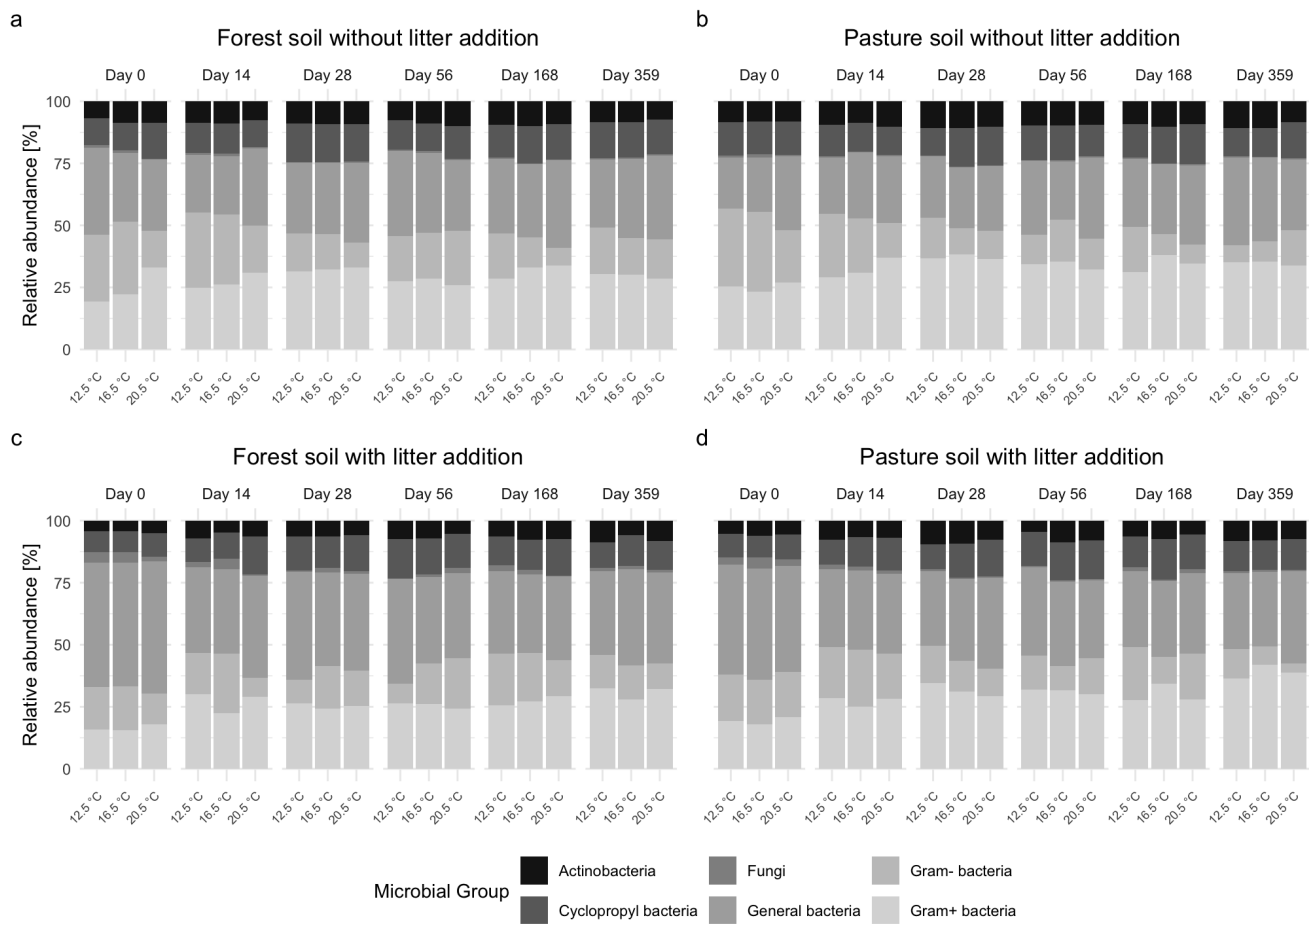

**Figure S1.** Relative phospholipid fatty acid (PLFA) abundance of the total concentrations for functional microbial groups (general bacteria, Gram<sup>+</sup> bacteria, Gram<sup>-</sup> bacteria, fungi, actinobacteria, cyclopropyl bacteria) in (a) subalpine forest soil without litter addition, (b) subalpine pasture soil without litter addition, (c) subalpine forest soil with *L. perenne* litter addition, and (d) subalpine pasture soil with *L. perenne* litter addition. Soils were incubated for 360 days at three temperatures (12.5 °C, 16.5 °C, 20.5 °C).

**Table S1.** Sampling scheme of the incubation experiment with dates of the respiration measurements and the six destructive samplings.

|                            |                                                                | Measurement | Date            | Incubation Day |
|----------------------------|----------------------------------------------------------------|-------------|-----------------|----------------|
| <b>Pre-<br/>incubation</b> | <b>Start pre-incubation</b>                                    | -           | 22.07.21        | -18            |
|                            |                                                                | 1           | 29.07.21        | -11            |
|                            |                                                                | 2           | 05.08.21        | -4             |
| <b>Incubation</b>          | <b>Start incubation, litter addition, destructive sampling</b> | <b>3</b>    | <b>09.08.21</b> | <b>0</b>       |
|                            |                                                                | 4           | 12.08.21        | 3              |
|                            |                                                                | 5           | 17.08.21        | 8              |
|                            |                                                                | 6           | 19.08.21        | 10             |
|                            | <b>Destructive sampling</b>                                    | <b>7</b>    | <b>23.08.21</b> | <b>14</b>      |
|                            |                                                                | 8           | 30.08.21        | 21             |
|                            | <b>Destructive sampling</b>                                    | <b>9</b>    | <b>06.09.21</b> | <b>28</b>      |
|                            |                                                                | 10          | 20.09.21        | 42             |
|                            | <b>Destructive sampling</b>                                    | <b>11</b>   | <b>04.10.21</b> | <b>56</b>      |
|                            |                                                                | 12          | 18.10.21        | 70             |
|                            |                                                                | 13          | 08.11.21        | 91             |
|                            |                                                                | 14          | 29.11.21        | 112            |
|                            |                                                                | 15          | 16.12.21        | 129            |
|                            |                                                                | 16          | 05.01.22        | 149            |
|                            | <b>Destructive sampling</b>                                    | <b>17</b>   | <b>24.01.22</b> | <b>168</b>     |
|                            |                                                                | 18          | 22.02.22        | 197            |
|                            |                                                                | 19          | 28.03.22        | 231            |
|                            |                                                                | 20          | 25.04.22        | 259            |
|                            |                                                                | 21          | 30.05.22        | 294            |
|                            |                                                                | 22          | 01.07.22        | 326            |
|                            | <b>End incubation, destructive sampling</b>                    | <b>23</b>   | <b>03.08.22</b> | <b>359</b>     |
